# Supplementary material for: Polyaniline stabilized barium titanate nanoparticles reinforced epoxy nanocomposites with high dielectric permittivity and reduced flammability
Source: Royal Society of Chemistry journal article supplement (doi:10.1039/c3tc30129j), 2013-01-01
Supplement: c3tc30129j.pdf [file c3tc30129j.pdf]

## Supporting Materials for

# **Polyaniline Stabilized Barium Titanate Nanoparticles Reinforced Epoxy Nanocomposites with High Dielectric Permittivity and Reduced Flammability**

Xi Zhang,<sup>1,2</sup> Qingliang He,<sup>1,2</sup> Hongbo Gu,<sup>1,2</sup> Suying Wei<sup>2,\*</sup> and Zhanhu Guo<sup>1,\*</sup>

**<sup>1</sup>Integrated Composites Laboratory (ICL)  
Dan F Smith Department of Chemical Engineering  
Lamar University, Beaumont, TX 77710 USA**

**<sup>2</sup>Department of Chemistry and Biochemistry  
Lamar University, Beaumont, TX 77710 USA**

\* Corresponding author:

Email: [zhanhu.guo@lamar.edu](mailto:zhanhu.guo@lamar.edu); Phone: (409) 880-7654 (Z. G.)

Email: [suying.wei@lamar.edu](mailto:suying.wei@lamar.edu); Phone: (409) 880-7976 (S. W.)

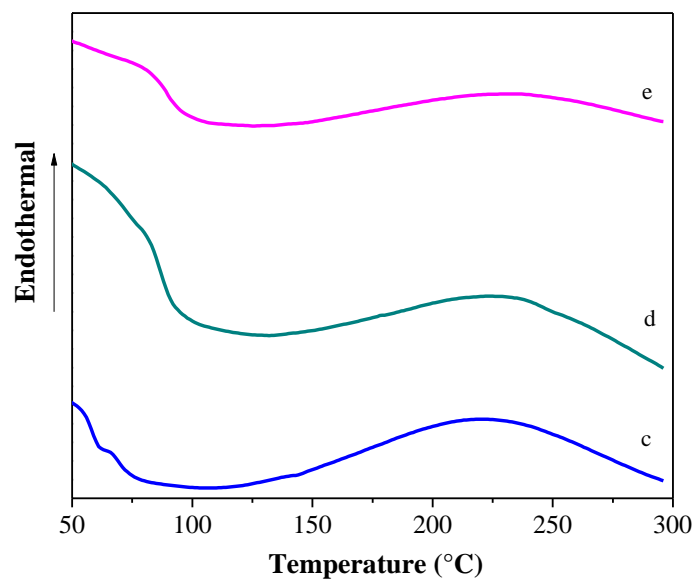

**Fig. S1** DSC curves of the cured PNCs with (c) 1.0 wt% BaTiO<sub>3</sub> (500 nm), (d) 5.0 wt% BaTiO<sub>3</sub> (500 nm), and (e) 10.0 wt% BaTiO<sub>3</sub> (500 nm).
